# Supplementary material for: Structure-Based Understanding of Binding Affinity and Mode of Estrogen Receptor α Agonists and Antagonists
Source: PubMed Central journal article supplement (PMC5218732; doi:10.1371/journal.pone.0169607), 2017-01-06
Supplement: pone.0169607.s003.pdf [file pone.0169607.s003.pdf]

| Amino acid | Residue Number                    | Atom                                                                                           |
|------------|-----------------------------------|------------------------------------------------------------------------------------------------|
| Met        | 343, 388, 421, 528                | C $\beta$ , C $\gamma$ , S $\delta$ , C $\epsilon$                                             |
| Leu        | 346, 349, 384, 387, 391, 428, 525 | C $\beta$ , C $\gamma$ , C $\delta$ 1, C $\delta$ 2                                            |
| Ala        | 350                               | C $\beta$                                                                                      |
| Val        | 418                               | C $\beta$ , C $\gamma$ 1, C $\gamma$ 2                                                         |
| Phe        | 404                               | C $\beta$ , C $\gamma$ , C $\delta$ 1, C $\delta$ 2, C $\epsilon$ 1, C $\epsilon$ 2, C $\zeta$ |
| Ile        | 424                               | C $\beta$ , C $\gamma$ 1, C $\gamma$ 2, C $\delta$                                             |
| His        | 524                               | C $\beta$ , C $\gamma$ , CD2                                                                   |
