# Supplementary material for: Structure-Based Understanding of Binding Affinity and Mode of Estrogen Receptor α Agonists and Antagonists
Source: PubMed Central journal article supplement (PMC5218732; doi:10.1371/journal.pone.0169607), 2017-01-06
Supplement: pone.0169607.s004.pdf [file pone.0169607.s004.pdf]

| PDB  | Receptor type | Ligand                                                                                                                    |    | Fingerprint <sup>b</sup> |      | Log RBA |       |
|------|---------------|---------------------------------------------------------------------------------------------------------------------------|----|--------------------------|------|---------|-------|
|      |               | Name                                                                                                                      | Id | FPs 1, 2, 3, 4, 5        | FP6  | Exp     | Cal   |
| 1ERE | closed        | 17β-Estradiol (E2)                                                                                                        | 1  | 0, 1, 1, 0, 0            | 1.85 | 2.00    | 1.71  |
| 1G50 |               |                                                                                                                           |    |                          | 2.05 |         | 2.47  |
| 1GWR |               |                                                                                                                           |    |                          | 1.94 |         | 2.06  |
| 1PCG |               |                                                                                                                           |    |                          | 1.98 |         | 2.21  |
| 1QKU |               |                                                                                                                           |    |                          | 1.93 |         | 1.99  |
| 2OCF |               |                                                                                                                           |    |                          | 1.86 |         | 1.72  |
| 2YJA |               |                                                                                                                           |    |                          | 2.01 |         | 2.32  |
| 4PXM |               |                                                                                                                           |    |                          | 1.95 |         | 2.08  |
| 3ERT | moved back    | 4-Hydroxytamoxifen                                                                                                        | 2  | 1, 1, 0, 0, 0            | 2.20 | 2.24    | 2.28  |
| 4Q50 | open          |                                                                                                                           |    |                          | 1.99 |         | 1.47  |
| 1R5K | open          | (2E)-3-[4-[(1Z)-1,2-Diphenyl-1-buten-1-yl]phenyl]acrylic acid                                                             | 3  | 1, 0, 0, 0, 0            | 2.05 | 0.27    | -0.49 |
| 5AAV | moved back    |                                                                                                                           |    |                          | 2.32 |         | 0.55  |
| 1SJ0 | closed        | (2S,3R)-3-(4-hydroxyphenyl)-2-[4-(2-piperidin-1-ylethoxy)phenyl]-2,3-dihydro-1,4-benzoxathiin-6-ol                        | 4  | 1, 1, 1, 0, 0            | 1.74 | 2.29    | 2.20  |
| 1UOM | closed        | (1R)-2-phenyl-1-[4-(2-piperidin-1-ylethoxy)phenyl]-3,4-dihydro-1H-isoquinolin-6-ol                                        | 5  | 1, 1, 0, 0, 0            | 1.96 | 1.56    | 1.36  |
| 1X7E | closed        | 2-[5-hydroxy-2-(4-hydroxyphenyl)-1-benzofuran-7-yl]ethanenitrile                                                          | 6  | 0, 1, 1, 0, 0            | 1.24 | -0.25   | -0.66 |
| 1X7R | closed        | Genistein                                                                                                                 | 7  | 0, 1, 1, 0, 1            | 1.22 | -0.36   | -0.13 |
| 1XP1 | closed        | (2S,3R)-2-[4-[2-[(3R,4R)-3,4-dimethylpyrrolidin-1-yl]ethoxy]phenyl]-3-(4-hydroxyphenyl)-2,3-dihydro-1,4-benzoxathiin-6-ol | 8  | 1, 1, 1, 0, 0            | 1.80 | 3.11    | 2.44  |
| 1XP6 | closed        | (2S,3R)-2-[4-[2-[(3S,4S)-3,4-dimethylpyrrolidin-1-yl]ethoxy]phenyl]-3-(4-hydroxyphenyl)-2,3-dihydro-1,4-benzoxathiin-6-ol | 9  | 1, 1, 1, 0, 0            | 1.88 | 3.21    | 2.74  |
| 1XP9 | closed        | (2S,3R)-3-(4-hydroxyphenyl)-2-[4-[(2S)-2-pyrrolidin-1-ylpropoxy]phenyl]-2,3-dihydro-1,4-benzoxathiin-6-ol                 | 10 | 1, 1, 1, 0, 0            | 1.86 | 2.70    | 2.66  |
| 1XPC | closed        | (2S,3R)-3-(4-hydroxyphenyl)-2-[4-[(2R)-2-pyrrolidin-1-ylpropoxy]phenyl]-2,3-dihydro-1,4-benzoxathiin-6-ol                 | 11 | 1, 1, 1, 0, 0            | 1.86 | 2.58    | 2.64  |
| 1XQC | moved back    | (1R)-1-[4-[(9aS)-octahydro-2H-pyrido[1,2-a]pyrazin-2-yl]phenyl]-2-phenyl-1,2,3,4-tetrahydroisoquinolin-6-ol               | 12 | 1, 1, 0, 0, 0            | 2.00 | 1.18    | 1.52  |
| 1YIM | closed        | (2R,3R,4S)-3-(4-hydroxyphenyl)-4-methyl-2-[4-(2-pyrrolidin-1-ylethoxy)phenyl]-3,4-dihydro-2H-chromen-6-ol                 | 13 | 1, 1, 1, 0, 0            | 1.87 | 2.64    | 2.71  |
| 1YIN | closed        | (2R,3R,4S)-5-fluoro-3-(4-hydroxyphenyl)-4-methyl-2-[4-(2-piperidin-1-ylethoxy)phenyl]-3,4-dihydro-2H-chromen-6-ol         | 14 | 1, 1, 1, 0, 0            | 2.01 | 2.91    | 3.25  |
| 2IOG | open          | N-[(2R)-4-(4-hydroxyphenyl)butan-2-yl]-2-[2-phenyl-6-(2-piperidin-1-ylethoxy)-1H-indol-3-yl]ethanamide                    | 15 | 1, 1, 0, 0, 0            | 2.01 | 1.91    | 1.54  |
| 2IOK | open          | N-[(2R)-4-(4-hydroxyphenyl)butan-2-yl]-2-(2-phenyl-1H-indol-3-yl)ethanamide                                               | 16 | 0, 1, 0, 0, 0            | 2.44 | 2.81    | 2.28  |

| PDB  | Receptor type | Ligand                                                                                         |    | Fingerprint <sup>b</sup> |      | Log RBA |       |
|------|---------------|------------------------------------------------------------------------------------------------|----|--------------------------|------|---------|-------|
|      |               | Name                                                                                           | Id | FPs 1, 2, 3, 4, 5        | FP6  | Exp     | Cal   |
| 2OUZ | moved back    | (5R,6S)-6-phenyl-5-[4-(2-pyrrolidin-1-ylethoxy)phenyl]-5,6,7,8-tetrahydronaphthalen-2-ol       | 17 | 1, 1, 0, 0, 0            | 2.14 | 2.21    | 2.07  |
| 2QXS | closed        | Raloxifene                                                                                     | 18 | 1, 1, 1, 0, 0            | 1.95 | 2.12    | 3.00  |
| 3ERD | closed        | Diethylstilbestrol                                                                             | 19 | 0, 1, 1, 0, 0            | 2.16 | 2.60    | 2.89  |
| 3Q95 | closed        | Estriol                                                                                        | 20 | 0, 1, 1, 0, 0            | 1.57 | 0.99    | 0.60  |
| 3UU7 | closed        | Bisphenol A                                                                                    | 21 | 0, 1, 0, 0, 0            | 1.27 | -2.11   | -2.24 |
| 3UUA | closed        | Bisphenol AF                                                                                   | 22 | 0, 1, 0, 1, 0            | 1.40 | -0.11   | -0.23 |
| 3UUC | closed        | Bisphenol C                                                                                    | 23 | 0, 1, 0, 1, 0            | 1.60 | 0.42    | 0.54  |
| 4MG5 | closed        | Kepone                                                                                         | 24 | 0, 0, 0, 0, 0            | 1.86 | -1.89   | -2.15 |
| 4MG8 | closed        | $\alpha$ -Zearalanol                                                                           | 25 | 0, 1, 1, 0, 1            | 1.67 | 1.48    | 1.63  |
| 4MG9 | closed        | Butyl paraben                                                                                  | 26 | 0, 1, 0, 0, 0            | 1.25 | -3.07   | -2.30 |
| 4MGA | closed        | 4-(2,4,4-trimethylpentan-2-yl)phenol                                                           | 27 | 0, 1, 0, 0, 0            | 1.46 | -1.82   | -1.49 |
| 4MGC | closed        | Bis(2,4-dihydroxyphenyl)methanone                                                              | 28 | 0, 1, 1, 0, 2            | 0.80 | -1.03   | -1.13 |
| 4MGD | closed        | HPTE                                                                                           | 29 | 0, 1, 0, 1, 0            | 1.57 | -0.60   | 0.41  |
| 4TUZ | closed        | $\alpha$ -Zearalenol                                                                           | 30 | 0, 1, 1, 0, 1            | 1.62 | 1.63    | 1.44  |
| 4TV1 | closed        | Propyl 4-hydroxybenzoate                                                                       | 31 | 0, 1, 0, 0, 0            | 0.99 | -3.22   | -3.32 |
| 1ERR | closed        | Raloxifene                                                                                     | 32 | 1, 1, 1, 0, 0            | 1.89 | NA      | 2.78  |
| 1GWQ | closed        | 2-(4-hydroxyphenyl)-1-benzothiophen-6-ol                                                       | 33 | 0, 1, 1, 0, 0            | 1.45 | NA      | 0.14  |
| 1ZKY | closed        | 4-[(1S,2S,5S,6S,9S)-5-(hydroxymethyl)-6,8,9-trimethyl-3-oxabicyclo[3.3.1]non-7-en-2-yl]phenol  | 34 | 0, 1, 1, 0, 0            | 1.64 | NA      | 0.88  |
| 2AYR | open          | 6-(4-methylsulfonylphenyl)-5-[4-(2-piperidin-1-ylethoxy)phenoxy]naphthalen-2-ol                | 35 | 1, 1, 0, 0, 0            | 1.60 | NA      | -0.04 |
| 2B1V | closed        | 4-[(1s,2s,5s)-5-(hydroxymethyl)-8-methyl-3-oxabicyclo[3.3.1]non-7-en-2-yl]phenol               | 36 | 0, 1, 1, 0, 0            | 1.51 | NA      | 0.40  |
| 2B1Z | moved back    | 17-Methyl-17-Alpha-Dihydroequilenin                                                            | 37 | 0, 0, 0, 0, 0            | 2.15 | NA      | -1.04 |
| 2FAI | closed        | 4-[(1R,2S,5S,9R)-5-(hydroxymethyl)-8,9-dimethyl-3-oxabicyclo[3.3.1]nonan-2-yl]phenol           | 38 | 0, 1, 1, 0, 0            | 1.44 | NA      | 0.13  |
| 2G44 | moved back    | 4-[(1s,2r,5s)-4,4,8-Trimethyl-3-Oxabicyclo[3.3.1]non-7-En-2-Yl]phenol                          | 39 | 0, 1, 0, 0, 0            | 1.74 | NA      | -0.41 |
| 2P15 | closed        | (17 $\beta$ )-17-[(E)-2-[2-(trifluoromethyl)phenyl]vinyl]estra-1(10),2,4-triene-3,17-diol      | 40 | 0, 1, 1, 0, 0            | 3.07 | NA      | 6.41  |
| 2POG | closed        | (3AS,4R,9BR)-4-(4-hydroxyphenyl)-1,2,3,3A,4,9B-hexahydrocyclopenta[C]chromen-9ol               | 41 | 1, 1, 0, 0, 0            | 1.78 | NA      | 0.65  |
| 2Q70 | closed        | (3AS,4R,9BR)-2,2-difluoro-4-(4-hydroxyphenyl)-1,2,3,3A,4,9B-hexahydrocyclopenta[C]chromen-8-ol | 42 | 1, 1, 0, 0, 0            | 1.78 | NA      | 0.68  |

| PDB  | Receptor type | Ligand                                                                                                             |    | Fingerprint <sup>b</sup> |      | Log RBA |       |
|------|---------------|--------------------------------------------------------------------------------------------------------------------|----|--------------------------|------|---------|-------|
|      |               | Name                                                                                                               | Id | FPs 1, 2, 3, 4, 5        | FP6  | Exp     | Cal   |
| 2R6W | closed        | [6-hydroxy-2-(4-hydroxyphenyl)-1-benzothiophen-3-yl]{4-[2-(4-methylpiperidin-1-yl)ethoxy]phenyl}methanone          | 43 | 1, 1, 1, 0, 0            | 2.04 | NA      | 3.38  |
| 2R6Y | closed        | [6-hydroxy-2-(4-hydroxyphenyl)-1-benzothiophen-3-yl][4-(2-pyrrolidin-1-ylethoxy)phenyl]methanone                   | 44 | 1, 1, 1, 0, 0            | 1.94 | NA      | 2.96  |
| 3DT3 | closed        | 5-(4-hydroxyphenoxy)-6-(3-hydroxyphenyl)-7-methyl-naphthalen-2-ol                                                  | 45 | 1, 1, 0, 0, 0            | 2.30 | NA      | 2.67  |
| 4IU7 | closed        | 4-[2-ethyl-7-(trifluoromethyl)indazol-3-yl]benzene-1,3-diol                                                        | 46 | 0, 1, 0, 0, 0            | 0.81 | NA      | -4.01 |
| 4IUI | open          | 4-[1-butyl-7-(trifluoromethyl)indazol-3-yl]benzene-1,3-diol                                                        | 47 | 0, 1, 0, 0, 1            | 1.36 | NA      | -1.27 |
| 4IV2 | open          | 4-[1-(2-methylpropyl)-7-(trifluoromethyl)indazol-3-yl]benzene-1,3-diol                                             | 48 | 0, 0, 0, 0, 1            | 1.72 | NA      | -2.09 |
| 4IV4 | moved back    | 4-[2-(2-methylpropyl)-7-(trifluoromethyl)indazol-3-yl]benzene-1,3-diol                                             | 49 | 0, 1, 0, 0, 0            | 1.77 | NA      | -0.31 |
| 4IVW | closed        | 4-[2-benzyl-7-(trifluoromethyl)-2H-indazol-3-yl]benzene-1,3-diol                                                   | 50 | 0, 1, 0, 0, 0            | 2.15 | NA      | 1.16  |
| 4IVY | moved back    | 4-[1-but-3-enyl-7-(trifluoromethyl)indazol-3-yl]benzene-1,3-diol                                                   | 51 | 0, 1, 0, 0, 1            | 1.68 | NA      | -0.03 |
| 4IW6 | moved back    | 4-[2-but-3-enyl-7-(trifluoromethyl)indazol-3-yl]benzene-1,3-diol                                                   | 52 | 0, 1, 0, 0, 0            | 1.86 | NA      | 0.03  |
| 4IW8 | open          | 4-[1-(3-methylbut-2-enyl)-7-(trifluoromethyl)indazol-3-yl]benzene-1,3-diol                                         | 53 | 0, 1, 0, 0, 1            | 1.71 | NA      | 0.09  |
| 4IWC | open          | 4,4'-thiene-2,5-diylbis(3-methylphenol)                                                                            | 54 | 0, 1, 0, 0, 0            | 2.18 | NA      | 1.28  |
| 4IWF | closed        | 2-chloro-3'-fluoro-3-[(E)-(hydroxyimino)methyl]biphenyl-4,4'-diol                                                  | 55 | 0, 1, 1, 0, 1            | 1.37 | NA      | 0.47  |
| 4MG6 | closed        | benzyl butyl benzene-1,2-dicarboxylate                                                                             | 56 | 0, 0, 0, 0, 0            | 2.02 | NA      | -1.55 |
| 4MG7 | closed        | Ferutinine                                                                                                         | 57 | 0, 0, 0, 0, 0            | 2.41 | NA      | -0.03 |
| 4MGB | closed        | 4,4'-propane-2,2-diylbis(2,6-dichlorophenol)                                                                       | 58 | 0, 0, 0, 0, 0            | 1.52 | NA      | -3.49 |
| 4PP6 | closed        | Resveratrol                                                                                                        | 59 | 0, 1, 1, 0, 0            | 1.13 | NA      | -1.07 |
| 4PPP | closed        | Fluoro-resveratrol                                                                                                 | 60 | 0, 1, 1, 0, 0            | 0.95 | NA      | -1.77 |
| 4PPS | closed        | (1S,3aR,5R,7aS)-5-(4-hydroxyphenyl)-7a-methyloctahydro-1H-inden-1-ol                                               | 61 | 0, 1, 1, 0, 0            | 1.56 | NA      | 0.56  |
| 4ZN9 | open          | Cyclohexa-2,5-dien-1-yl (1S,2R,4S)-5,6-bis(4-hydroxyphenyl)-7-oxabicyclo[2.2.1]hept-5-ene-2-sulfonate              | 62 | 0, 1, 0, 0, 0            | 1.75 | NA      | -0.36 |
| 5AAU | closed        | 3-(1-(4-Chlorophenyl)-3,4-dihydro-1H-pyrido(3,4-b)indol-2(9H)-yl)propanoic acid                                    | 63 | 0, 0, 1, 0, 0            | 0.68 | NA      | -5.02 |
| 5AK2 | moved back    | (E)-3-[4-[[3-(4-fluoranyl-2-methyl-phenyl)-7-oxidanyl-2-oxidanylidene-chromen-4-yl]methyl]phenyl]prop-2-enoic acid | 64 | 1, 1, 0, 0, 0            | 1.89 | NA      | 1.10  |

<sup>a</sup>NA: Not available

<sup>b</sup>FP1: salt-bridge with Asp351, FP2-FP4: hydrogen bond with Glu353, His524, and Thr347, respectively, FP5: number of internal hydrogen bonds, FP6: hydrophobic contact
